# Supplementary material
Source: MDPI journal article supplement (https://www.mdpi.com/2079-9276/10/2/19)
Supplement: s1 [file s1]

**RRMQ -Responsible resource management practices' questionnaire for remanufacturing SMEs**

| Criterion                             | Code        | Description of Responsible Resource Management Practice (RRMP)                                                                                               | Y/N* |
|---------------------------------------|-------------|--------------------------------------------------------------------------------------------------------------------------------------------------------------|------|
| <b>Water consumption level (WCL)</b>  | <b>WCL5</b> | water consumption is measured and controlled at work stations; water is reused (or closed loop) where possible                                               |      |
|                                       | <b>WCL4</b> | water consumption is measured and controlled at work stations; water is not reused                                                                           |      |
|                                       | <b>WCL3</b> | water usage is monitored ad hoc at output level/process level; water is not reused                                                                           |      |
|                                       | <b>WCL2</b> | water usage is monitored at hoc only at cost level (the invoices are reviewed); water is not reused                                                          |      |
|                                       | <b>WCL1</b> | water usage is not monitored ; water is not reused                                                                                                           |      |
| <b>Waste water (WW)</b>               | <b>WW5</b>  | sludge generation is monitored at work stations; water is reused where possible                                                                              |      |
|                                       | <b>WW4</b>  | sludge generation is monitored at work stations; water is not reused                                                                                         |      |
|                                       | <b>WW3</b>  | sludge generation is monitored at process output; water is not reused                                                                                        |      |
|                                       | <b>WW2</b>  | sludge generation is monitored at cost level (reviewing invoices); water is not reused                                                                       |      |
|                                       | <b>WW1</b>  | sludge generation is not monitored ; water is not reused                                                                                                     |      |
| <b>GHG Emissions level (GEL)</b>      | <b>GEL5</b> | GHG emissions are measured and monitored on regular basis; action are taken to systematically lower the emissions                                            |      |
|                                       | <b>GEL4</b> | GHG emissions are measured and monitored on regular basis; ad hoc actions are taken to lower the emissions                                                   |      |
|                                       | <b>GEL3</b> | GHG emissions are measured and monitored more often than it is required by the minimal legal regulations                                                     |      |
|                                       | <b>GEL2</b> | GHG emissions are measured and monitored; only if required by law; legal requirements are fully implemented                                                  |      |
|                                       | <b>GEL1</b> | GHG emissions are not measured and monitored; min. legal requirements are implemented                                                                        |      |
| <b>Energy consumption level (ECL)</b> | <b>ECL1</b> | Energy consumption is regularly measured and monitored; energy management system is implemented (e.g. ISO 50001)                                             |      |
|                                       | <b>ECL2</b> | Energy consumption is regularly measured and monitored; no energy management system is implemented; systematic actions are taken to lower energy consumption |      |
|                                       | <b>ECL3</b> | Energy consumption is regularly measured and monitored at facility level; ad hoc actions are taken to lower energy consumption                               |      |
|                                       | <b>ECL4</b> | Energy consumption is monitored at cost level (reviewing energy invoices)                                                                                    |      |
|                                       | <b>ECL5</b> | Energy consumption is not monitored; only min. legal requirements are implemented                                                                            |      |
| <b>Energy saving level (ESL)</b>      | <b>ESL5</b> | Energy saving actions are taken ; renewable energy is used as main source of energy                                                                          |      |
|                                       | <b>ESL4</b> | Energy saving actions are taken; renewable energy are used as complementary source of energy                                                                 |      |
|                                       | <b>ESL3</b> | Energy saving actions are taken ; the company does not use renewable energy sources                                                                          |      |
|                                       | <b>ESL2</b> | Some energy saving actions are taken ; company is not aware of the renewable energy alternatives                                                             |      |
|                                       | <b>ESL1</b> | Energy saving actions are taken only if required by legal regulations (e.g. changings bulbs for more energy-efficient ones)                                  |      |
| <b>Primary materials</b>              | <b>MCL5</b> | Quantity of primary materials at work station are monitored and measured; systematically actions are taken to lower primary materials consumption            |      |

\* Please kindly mark only one answer ("YES" - "Y") for each of the 10 provided criteria.

|                                                   |             |                                                                                                                                                                                                     |  |
|---------------------------------------------------|-------------|-----------------------------------------------------------------------------------------------------------------------------------------------------------------------------------------------------|--|
| <b>consumption level (MCL)</b>                    | <b>MCL4</b> | Quantity of primary materials at work stations are monitored and measured; ad hoc actions are taken to lower primary materials consumption                                                          |  |
|                                                   | <b>MCL3</b> | Quantity of primary materials are monitored and measured at process level; ad hoc actions are taken to lower primary materials consumption                                                          |  |
|                                                   | <b>MCL2</b> | Quantity of primary materials are monitored at cost level (reviewing invoices); ad hoc actions are taken to lower primary materials consumption                                                     |  |
|                                                   | <b>MCL1</b> | Quantity of primary materials are sometimes monitored at cost level (reviewing invoices); no additional actions are taken to lower primary materials consumption                                    |  |
| <b>Material recovery level (MRL)</b>              | <b>MRL5</b> | Materials recovery rate is measured and monitored at each stage of process/each work station ; systematically actions are taken to increase materials recovery above industry standards (e.g. APRA) |  |
|                                                   | <b>MRL4</b> | Materials recovery rate is measured and monitored at each stage of process/each work station; ad hoc actions are taken to increase materials recovery above industry standards (e.g. APRA)          |  |
|                                                   | <b>MRL3</b> | Materials recovery rate is monitored at end of process; actions are taken to keep materials recovery at industry standards (e.g. APRA)                                                              |  |
|                                                   | <b>MRL2</b> | Materials recovery rate is monitored at end of process ; actions are taken if materials recovery internal goal is not met                                                                           |  |
|                                                   | <b>MRL1</b> | Materials recovery rate is monitored at end of process ; additional actions are not taken                                                                                                           |  |
| <b>Waste generation level (WGL)</b>               | <b>WGL5</b> | Quantity of waste generated at work station are monitored and measured; systematically actions are taken to lower waste                                                                             |  |
|                                                   | <b>WGL4</b> | Quantity of waste generated at work stations are monitored and measured; ad hoc actions are taken to lower waste                                                                                    |  |
|                                                   | <b>WGL3</b> | Quantity of waste generated are monitored and measured at process level; ad hoc actions are taken to lower waste                                                                                    |  |
|                                                   | <b>WGL2</b> | Quantity of waste generated are monitored at cost level (reviewing invoices);ad hoc actions are taken to lower waste                                                                                |  |
|                                                   | <b>WGL1</b> | Quantity of waste generated are ad hoc monitored at cost level (reviewing invoices); no actions are taken to lower waste                                                                            |  |
| <b>Recycling level (RL)</b>                       | <b>RL5</b>  | Materials/scrap is sent for recycling; sorting procedures are implemented at each work station; actions are taken to systematically improve internal recycling goals                                |  |
|                                                   | <b>RL4</b>  | Materials/scrap is sent for recycling; sorting procedures are implemented at each work station; ad hoc actions are taken improve internal recycling goals                                           |  |
|                                                   | <b>RL3</b>  | Materials/scrap is sent for recycling ; actions are taken to meet internal recycling goals                                                                                                          |  |
|                                                   | <b>RL2</b>  | Materials/scrap is sent for recycling to meet legal requirements; additional internal goals are defined                                                                                             |  |
|                                                   | <b>RL1</b>  | Materials/scrap is sent for recycling to meet legal requirements; no additional actions are taken                                                                                                   |  |
| <b>Reused/recycled material consumption (RMC)</b> | <b>RMC1</b> | Recycled materials usage is not monitored; no additional actions are taken                                                                                                                          |  |
|                                                   | <b>RMC2</b> | Recycled materials are used to meet legal requirements; no additional internal goals are defined                                                                                                    |  |
|                                                   | <b>RMC3</b> | Recycled materials are used where possible; internal goals for secondary materials /parts are defined                                                                                               |  |
|                                                   | <b>RMC4</b> | Recycled materials are used where possible; ad hoc actions are taken to improve internal goal to                                                                                                    |  |
|                                                   | <b>RMC5</b> | Recycled materials are used where possible systematically actions are taken improve internal goal                                                                                                   |  |
